# Supplementary material for: Ecosystem Services Insights into Water Resources Management in China: A Case of Xi’an City
Source: MDPI journal article supplement (doi:10.3390/ijerph13121169), 2016-11-24

# Supplementary Materials: Ecosystem Services Insights into Water Resources Management in China: A Case of Xi'an City

Jingya Liu, Jing Li, Ziyi Gao, Min Yang, Keyu Qin and Xiaonan Yang

**Supplementary Text S1.** Survey questions regarding respondents' awareness of the benefits provided by nature, familiarity with the concept of ecosystem services, and the importance of the ecosystem services to the respondents.

**Questions for Figure 2.** Have you ever thought of nature in regards to the benefits and services outlined in previous question? Please state your level of awareness prior the survey.

Extremely aware ☐      Moderately aware ☐      Slightly aware ☐      Not at all aware ☐

**Questions for Figure 3.** How familiar are you with the following terms?

(a) Biodiversity

Extremely familiar ☐      Moderately familiar ☐      Slightly familiar ☐      Not at all familiar ☐

(b) Ecosystem services

Extremely familiar ☐      Moderately familiar ☐      Slightly familiar ☐      Not at all familiar ☐

(c) Habitat

Extremely familiar ☐      Moderately familiar ☐      Slightly familiar ☐      Not at all familiar ☐

**Questions for Figure 4.** The following are various services provided by nature in Xi'an. How important are they to YOU?

(a) Water for irrigation

Extremely important ☐      Moderately important ☐      Neutral ☐      Low importance ☐      Not important ☐

(b) Food: Fruit, grain, vegetable, etc.

Extremely important ☐      Moderately important ☐      Neutral ☐      Low importance ☐      Not important ☐

(c) Trees store carbon: healthy trees trap carbon from the atmosphere and help reduce air pollution

Extremely important ☐      Moderately important ☐      Neutral ☐      Low importance ☐      Not important ☐

(d) Moderation of natural disasters: natural vegetation can reduce the risk of extreme flooding, etc.

Extremely important ☐      Moderately important ☐      Neutral ☐      Low importance ☐      Not important ☐

(e) Spiritual experience and sense of place: be at one with nature and sense of belongingness

Extremely important ☐      Moderately important ☐      Neutral ☐      Low importance ☐      Not important ☐

(f) Recreation, mental and physical health

Extremely important ☐      Moderately important ☐      Neutral ☐      Low importance ☐      Not important ☐

(g) Aesthetic appreciation and inspiration for culture, art and design

Extremely important ☐      Moderately important ☐      Neutral ☐      Low importance ☐      Not important ☐

(h) Maintenance of biodiversity: maintaining the richness and variety of nature

Extremely important ☐      Moderately important ☐      Neutral ☐      Low importance ☐      Not important ☐

**Table S1.** The consequence table used for the Xi'an.

| Objective           | Food and Fibre                      | Freshwater                       | Carbon Sequestration                                            | Moderation of Extreme Events | Spiritual and Sense of Place | Recreational and Mental Health    | Aesthetic Appreciation and Cultural Inspiration | Water Resources                                                   |
|---------------------|-------------------------------------|----------------------------------|-----------------------------------------------------------------|------------------------------|------------------------------|-----------------------------------|-------------------------------------------------|-------------------------------------------------------------------|
| Performance Measure | Agricultural Production (Tons/Year) | Water Interception (Tonnes/Year) | Carbon Sequestration and Oxygen Release (Tonnes of Carbon/Year) | Soil Retention (Tons/Year)   | Forest Park (Counts)         | Recreational Opportunity (Counts) | Residential Properties near the River (ha)      | Total Amount of Water Resources (10 <sup>4</sup> m <sup>3</sup> ) |
| Xincheng district   | 0                                   | 11,239,500                       | 2,298,240                                                       | 100                          | 0                            | 10                                | 2360                                            | 3321                                                              |
| Beilin district     | 0                                   | 4,353,680                        | 876,819                                                         | 31                           | 0                            | 1                                 | 192                                             | 3417                                                              |
| Lianhu district     | 0                                   | 186,370                          | 42,371.4                                                        | 14                           | 0                            | 18                                | 10,141                                          | 4271                                                              |
| Baqiao district     | 72,800                              | 1686.6                           | 2998.57                                                         | 70                           | 0                            | 85                                | 29,077                                          | 4385                                                              |
| Weiyang district    | 26,800                              | 2741.82                          | 5584.37                                                         | 58                           | 224                          | 62                                | 17,594                                          | 2798                                                              |
| Yanta district      | 600                                 | 5,072,330                        | 1,038,150                                                       | 9                            | 1572                         | 11                                | 3031                                            | 3782                                                              |
| Yanliang district   | 96,000                              | 799.8                            | 4789.55                                                         | 46                           | 13,074                       | 120                               | 47,052                                          | 3891                                                              |
| Lintong district    | 401,000                             | 7,154,690                        | 1,462,140                                                       | 19                           | 2432                         | 40                                | 23,862                                          | 10,243                                                            |
| Chang'an district   | 414,900                             | 449,551                          | 77,975.8                                                        | 43                           | 115                          | 15                                | 6636                                            | 45,663                                                            |
| Lantian county      | 335,300                             | 745,414                          | 134,999                                                         | 37                           | 0                            | 20                                | 12,668                                          | 57,177                                                            |
| Zhouzhi county      | 288,600                             | 799,947                          | 167,138                                                         | 48                           | 0                            | 34                                | 22,838                                          | 85,431                                                            |
| Hu county           | 371,500                             | 2,803,800                        | 568,296                                                         | 51                           | 22,855                       | 56                                | 24,691                                          | 36,983                                                            |
| Gaoling county      | 209,000                             | 730,521                          | 142,528                                                         | 98                           | 23,607                       | 8                                 | 173                                             | 4430                                                              |

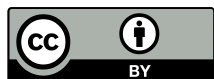

Supplement: s1 [file s1]
